# Supplementary material for: Transcriptomic profiling of three-dimensional cholangiocyte spheroids long term exposed to repetitive Clonorchis sinensis excretory-secretory products
Source: PubMed Central journal article supplement (PMC8056535; doi:10.1186/s13071-021-04717-2), 2021-04-20

# Additional File: Figure S1

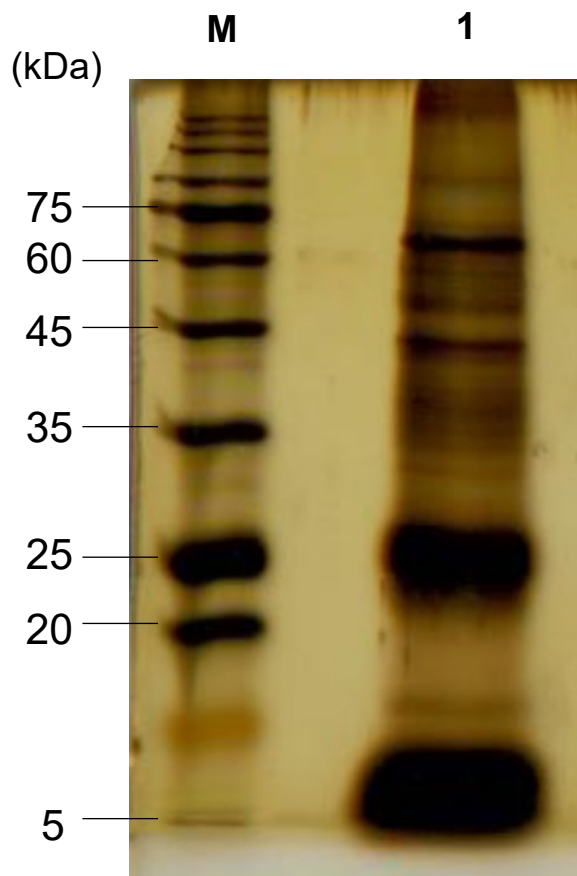

# Additional File: Figure S2

**a**

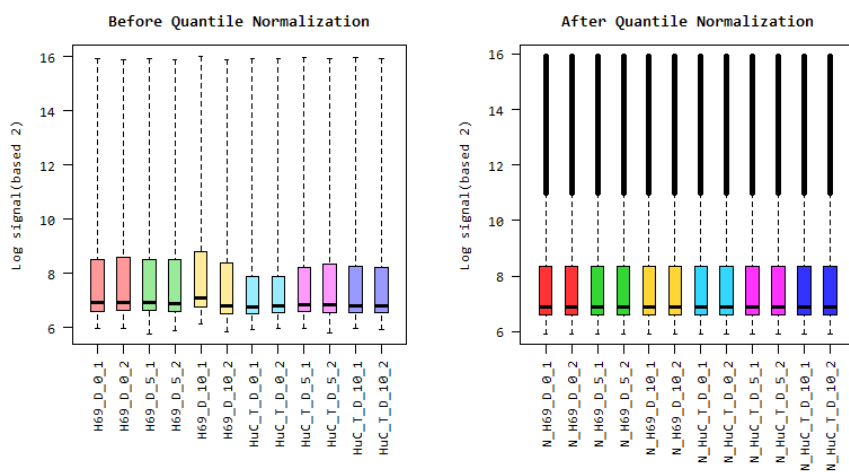

**b**

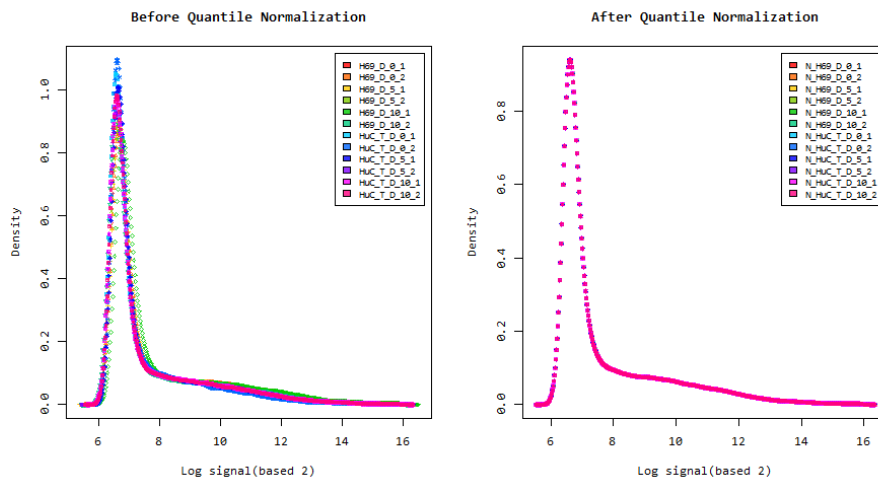

**c**

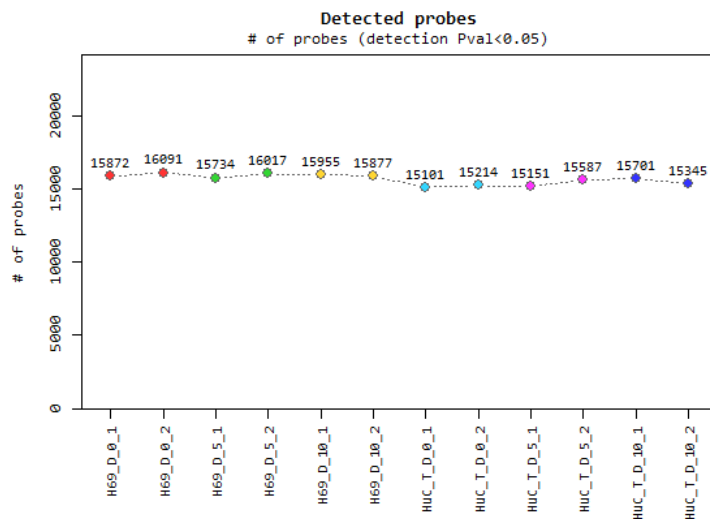

# Additional File: Figure S3

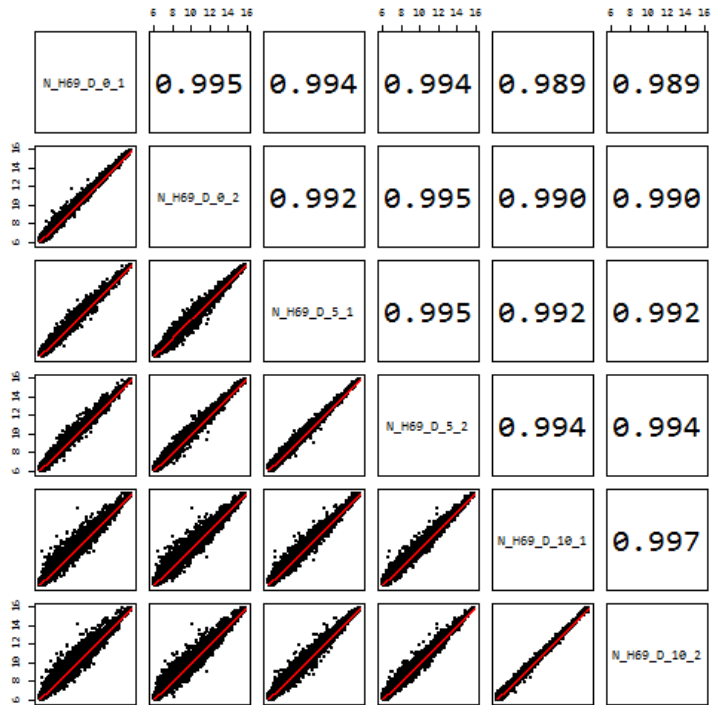

# Additional File: Figure S4

## Common at D10 - Process

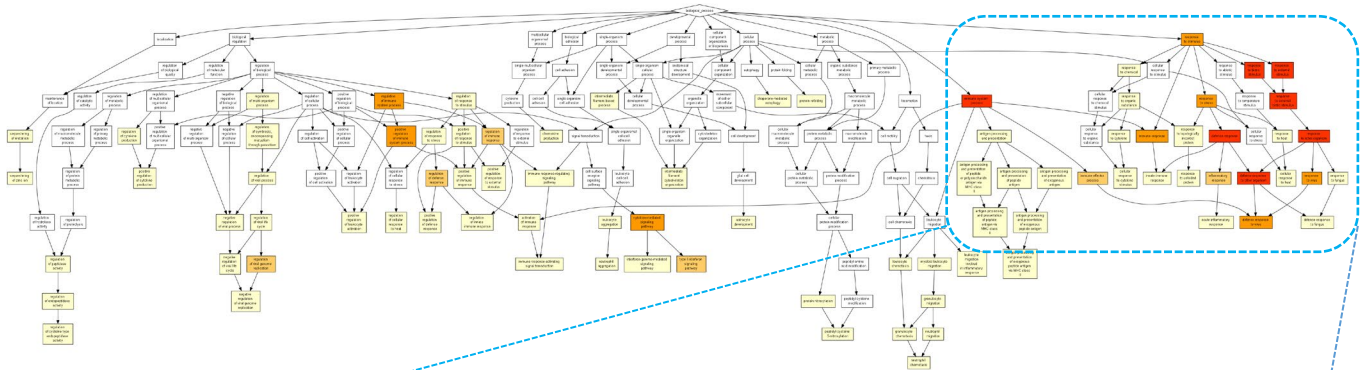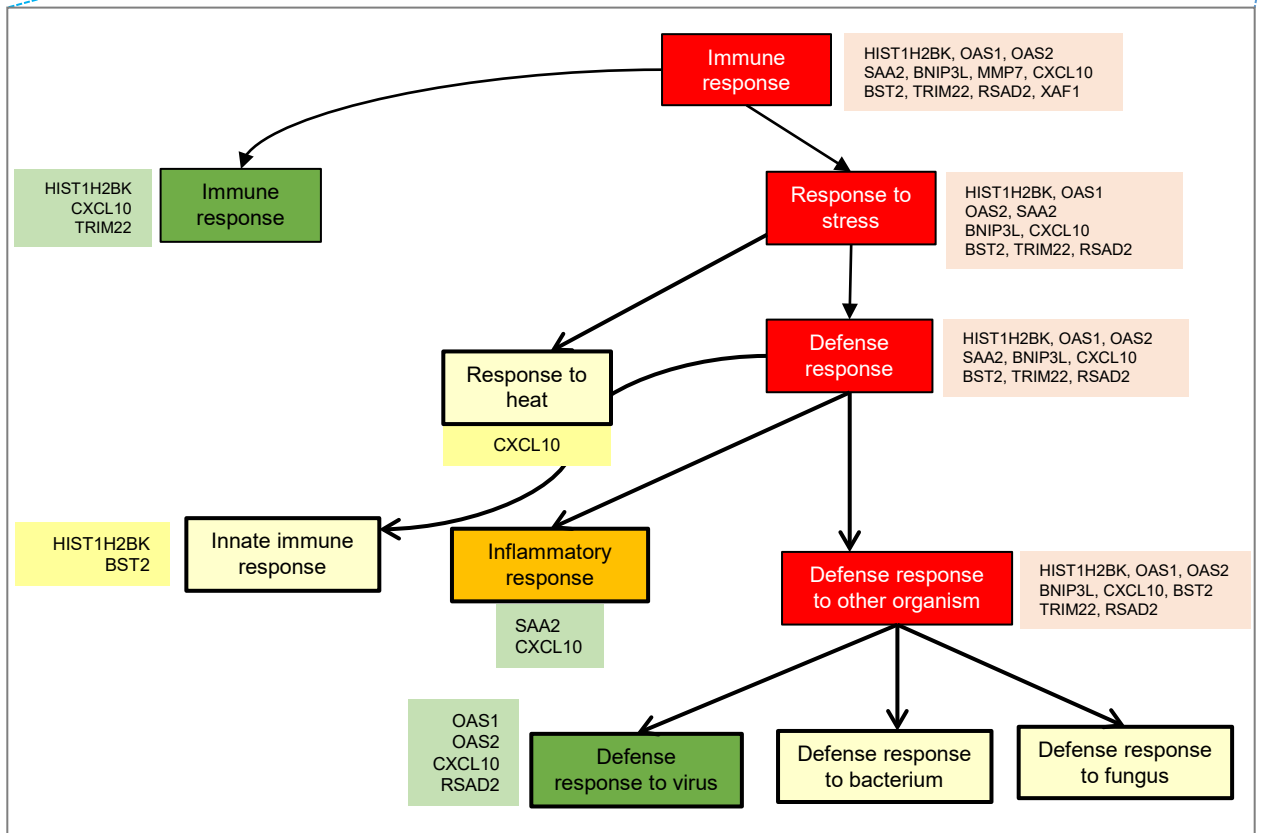

# Additional File: Figure S5

## H69 D0 vs D10 - Process

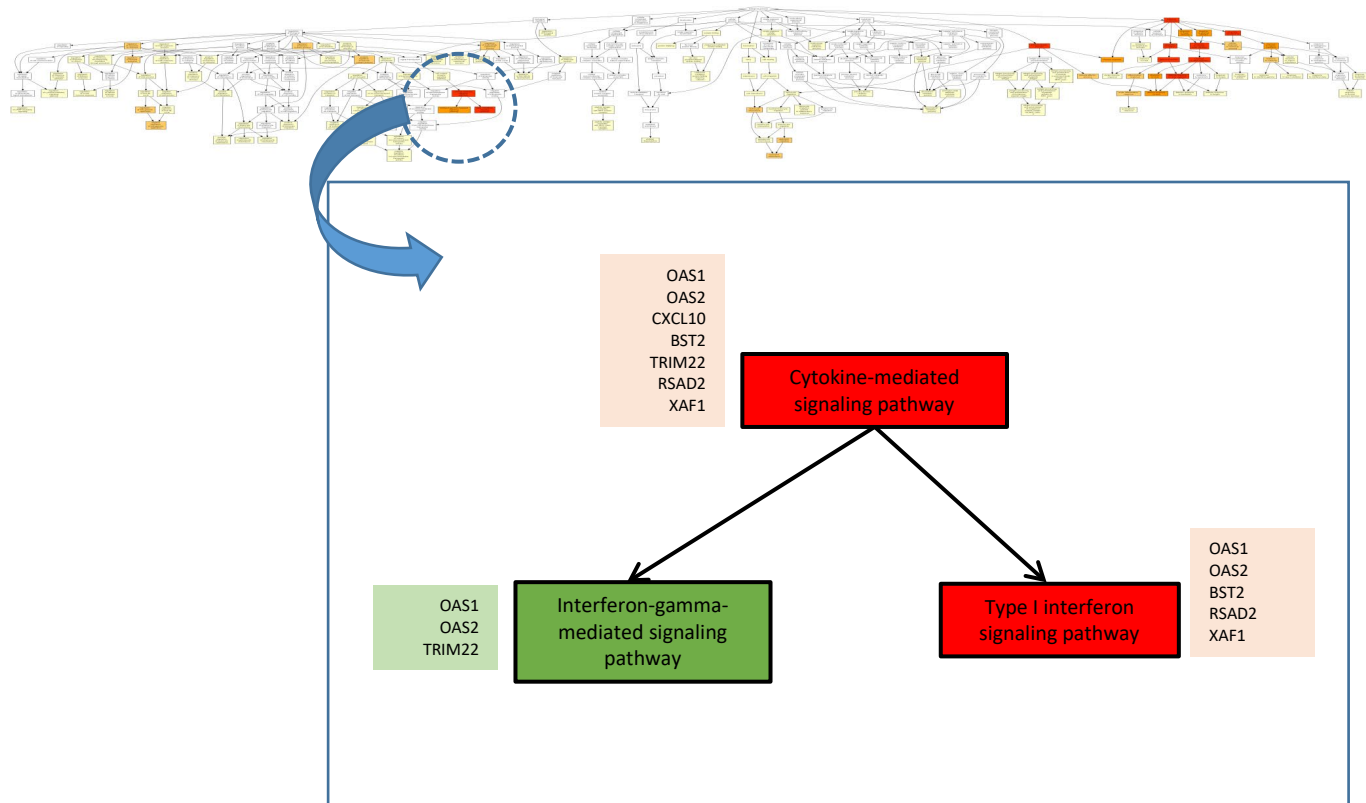

# Additional File: Figure S6

## H69 D0 vs D10 - Process

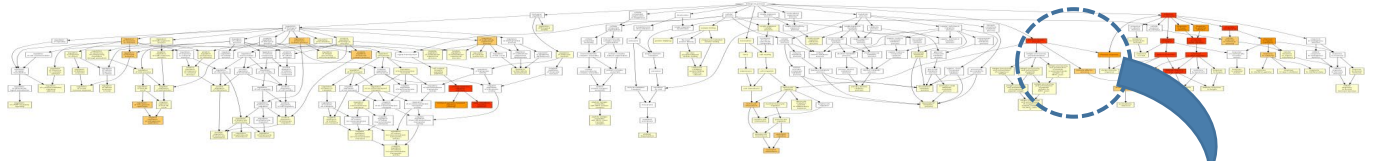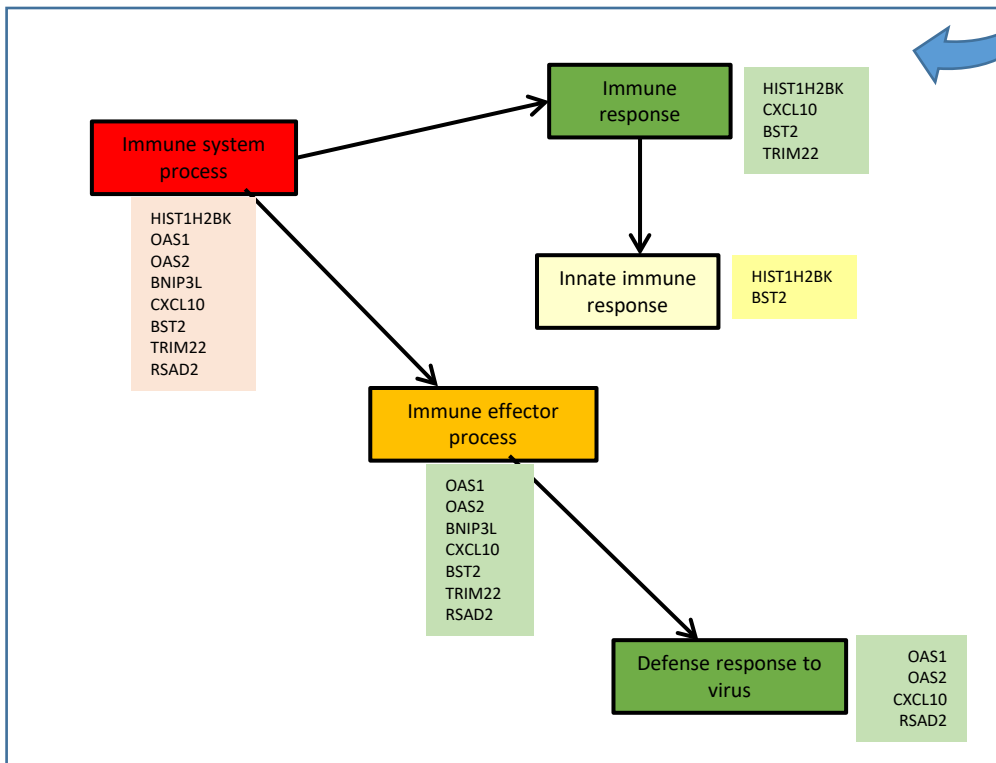

# Additional File: Figure S7

## H69 D0 vs D10 - Process

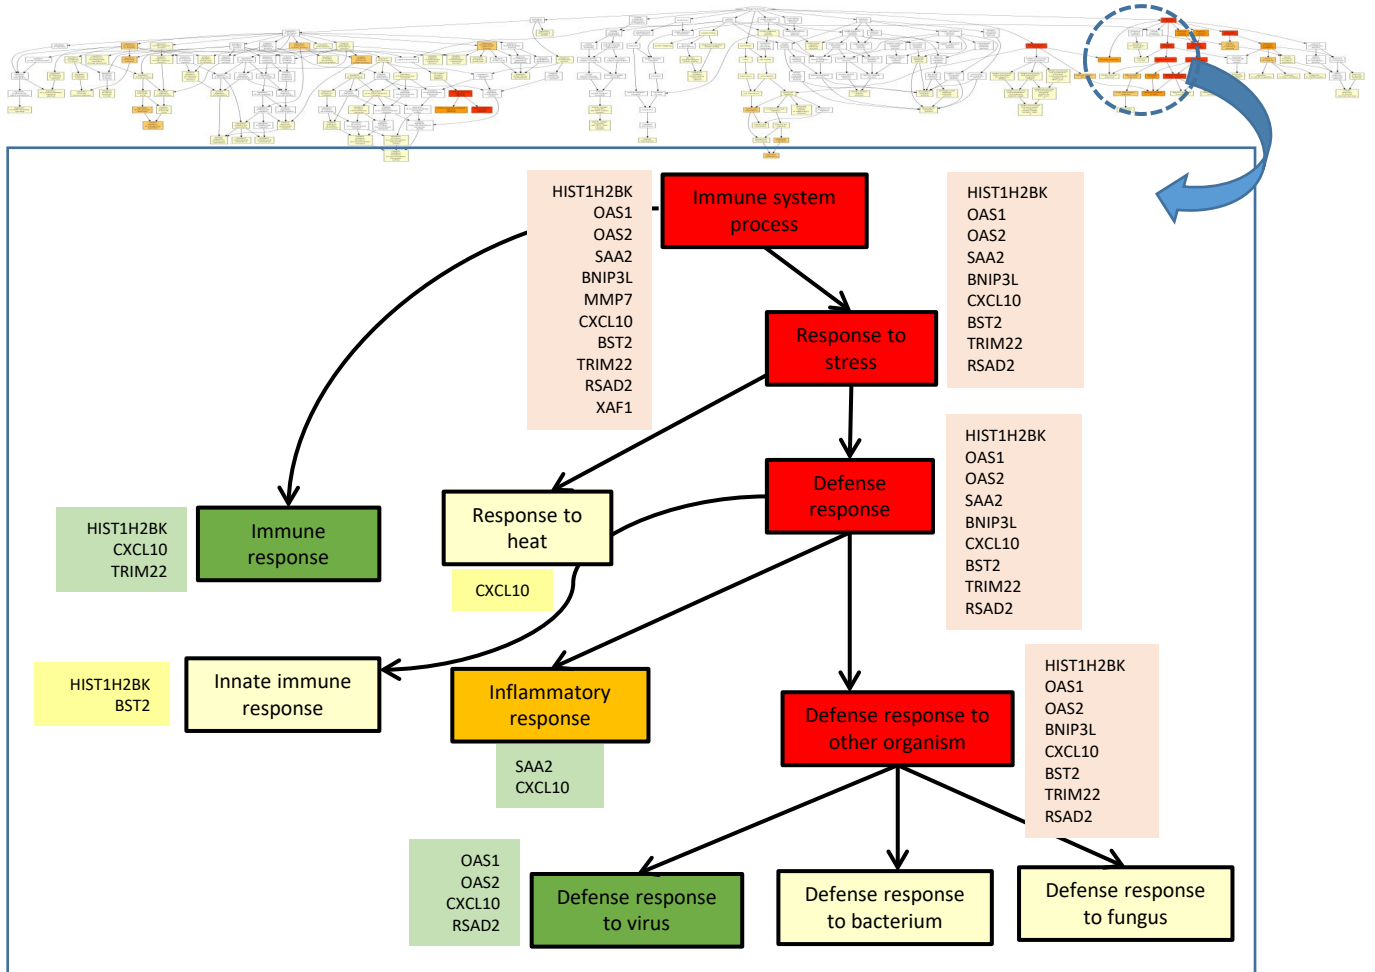

# Additional File: Figure S8

## H69 D0 vs D10 - Process

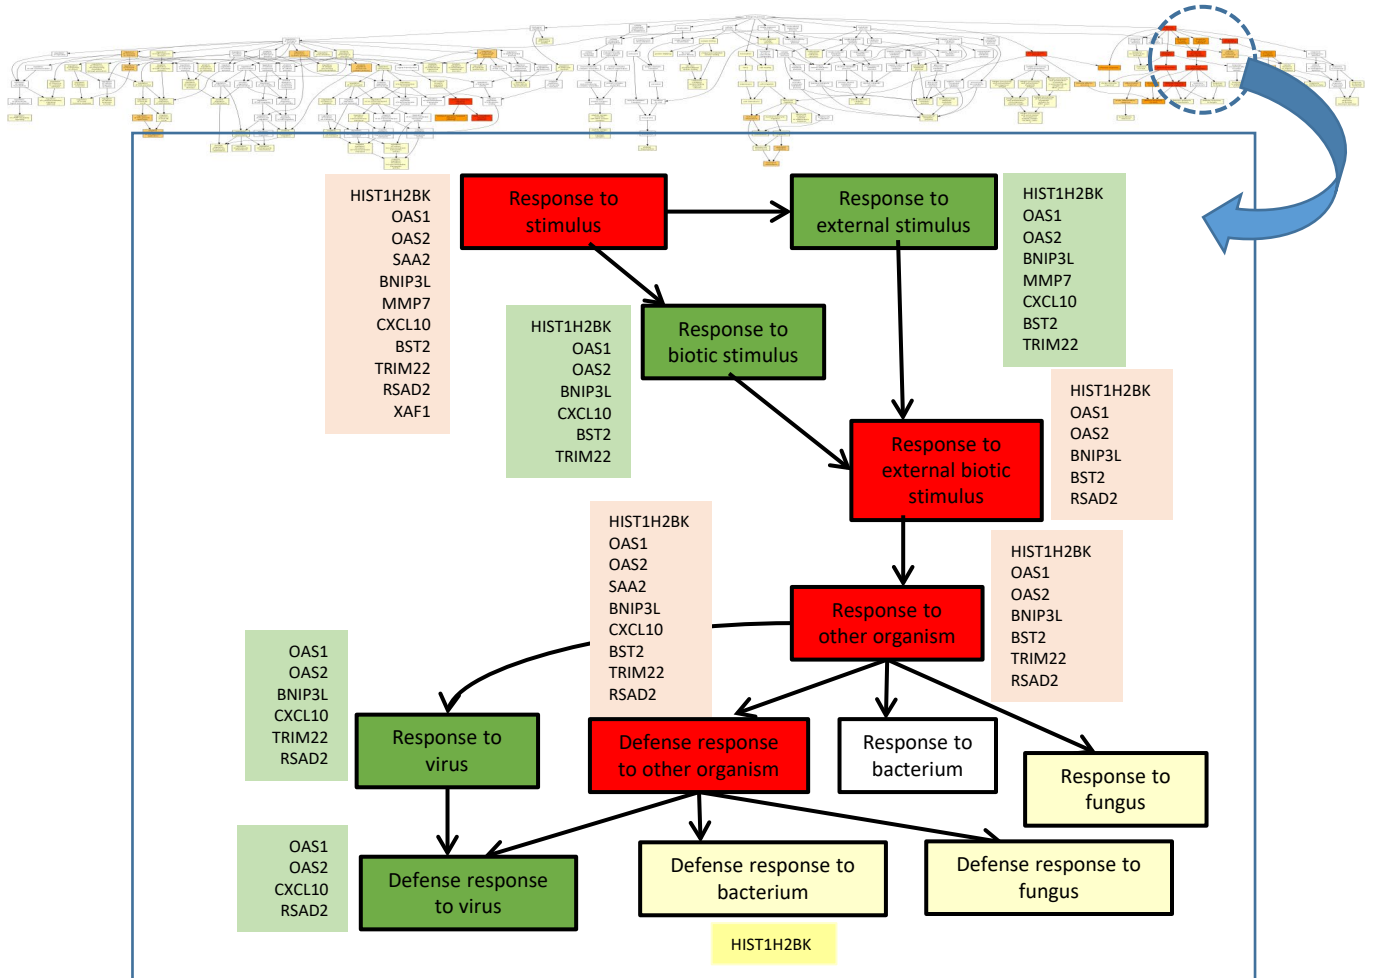



# Additional File: Figure S9

## H69 D0 vs D10 - Process

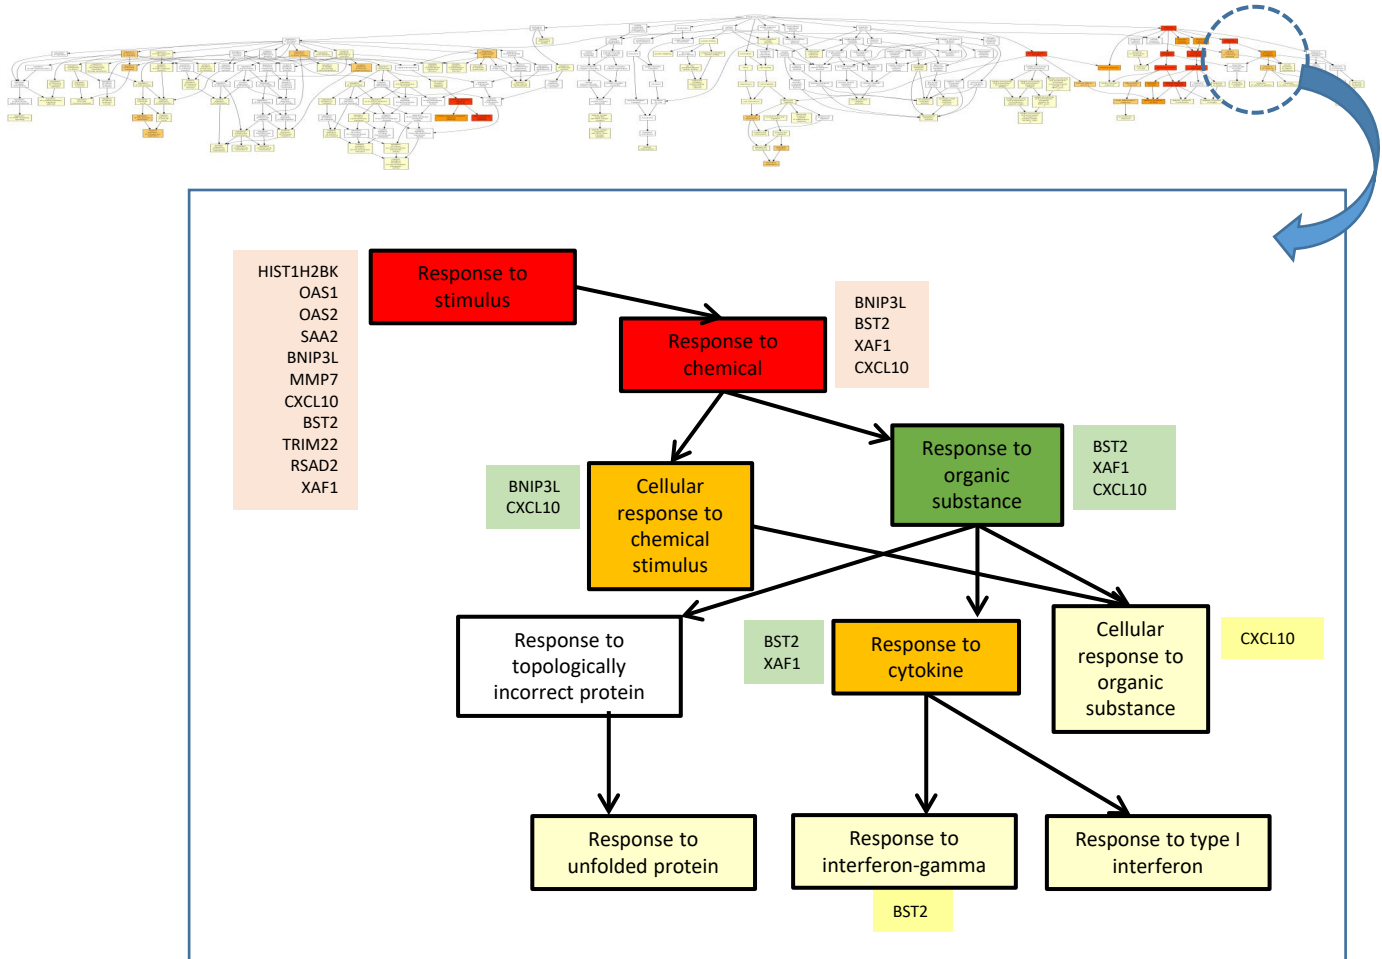

Supplement: 13071_2021_4717_MOESM1_ESM.pdf [file 13071_2021_4717_MOESM1_ESM.pdf]
